# Supplementary material for: An Instrumented Printed Insert for Continuous Monitoring of Distal Limb Motion in Suction and Elevated Vacuum Sockets
Source: MDPI journal article supplement (doi:10.3390/prosthesis4040056), 2022-12-02
Supplement: s1 [file s1]

## Supplement Figure S2

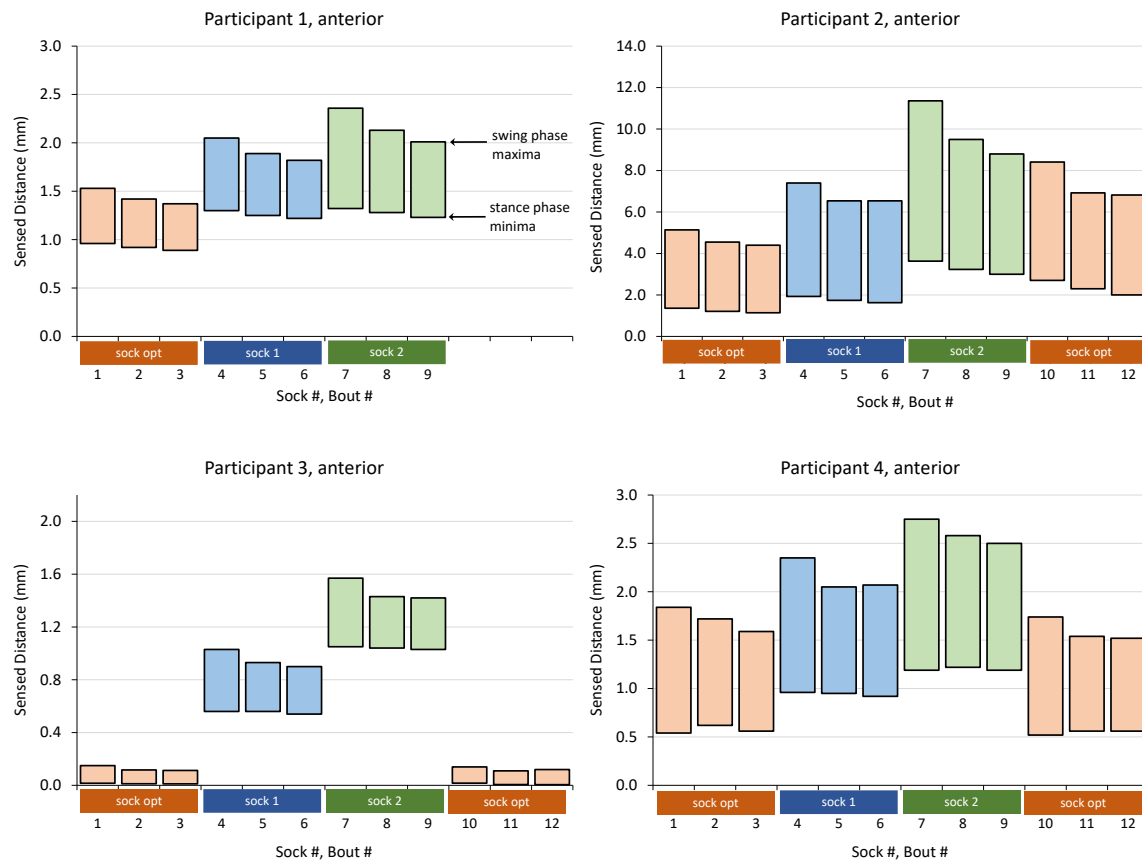

**Figure S2.** In-lab test results for the anterior sensors. Results from the anterior sensor for each participant are shown. Each bar shows the range of vertical limb motion during the steps in the cycle, where the top is the median maximum position for the last 10 steps and the bottom is the median minimum position for the last 10 steps. Maxima occurred during swing phase, and minima occurred during stance phase. Minimum distance (bottoms of the bars) increased for all sock additions and reduced for all sock reductions. Limb-socket vertical motion (length of the bars) increased for all sock additions and decreased for all sock reductions.
