# Supplementary material for: An Instrumented Printed Insert for Continuous Monitoring of Distal Limb Motion in Suction and Elevated Vacuum Sockets
Source: MDPI journal article supplement (doi:10.3390/prosthesis4040056), 2022-12-02
Supplement: s1 [file s1]

Supplement Figure S4

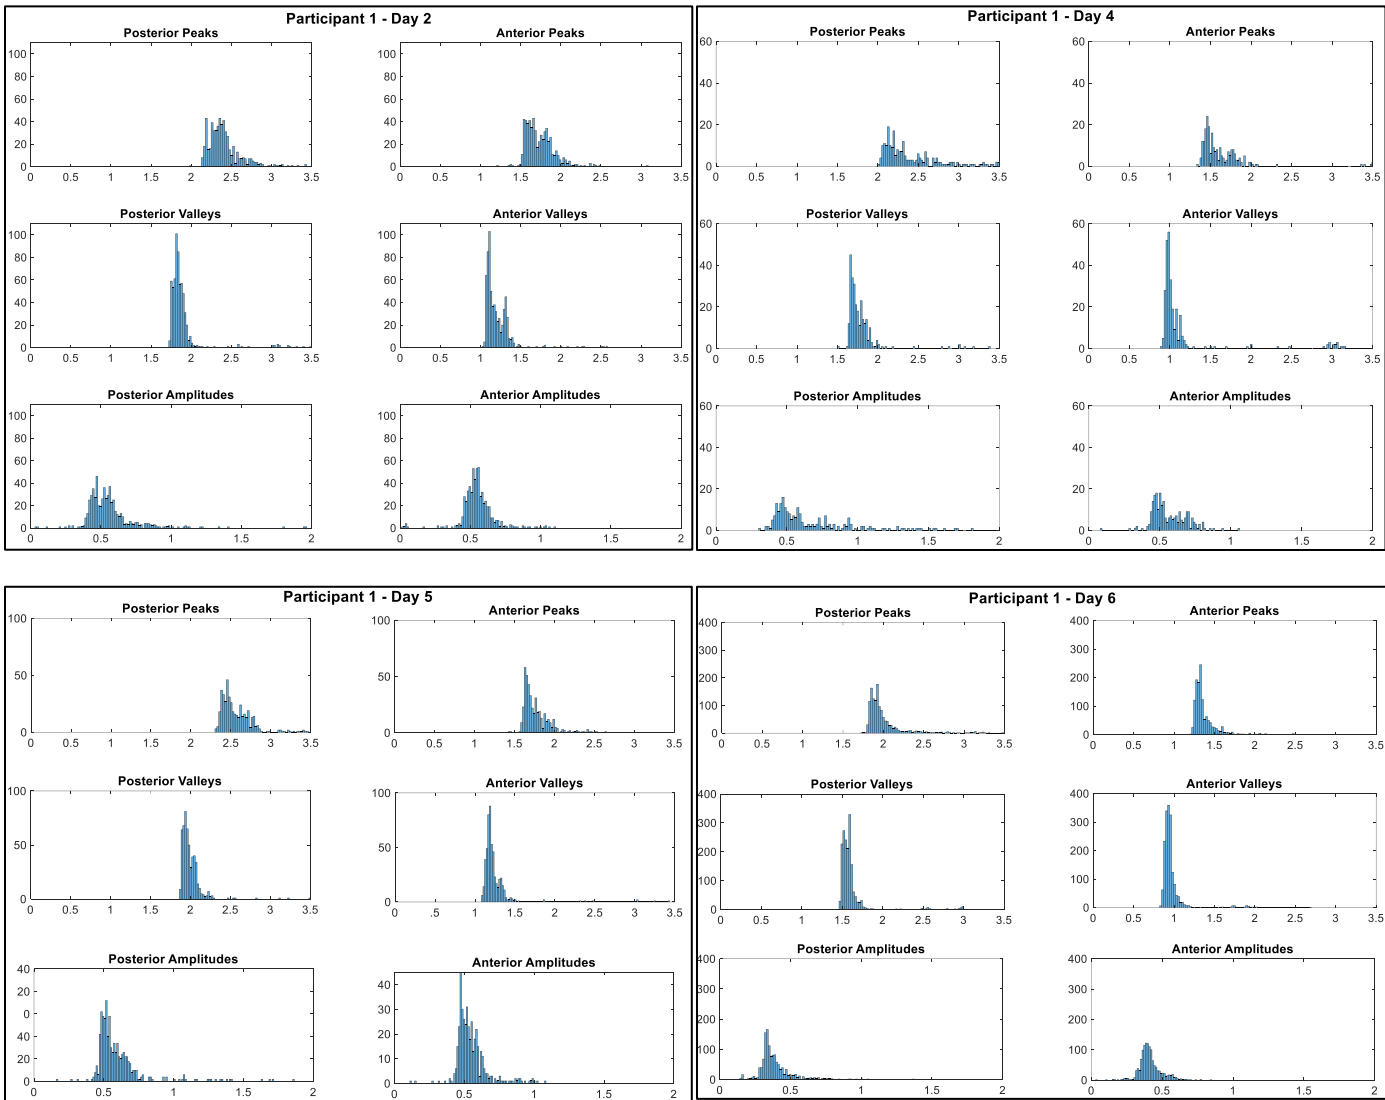

Figure S4a. Peak, valley, and amplitude histograms. Participant 1. Y-axes are number of steps. X-axes are distance in mm.

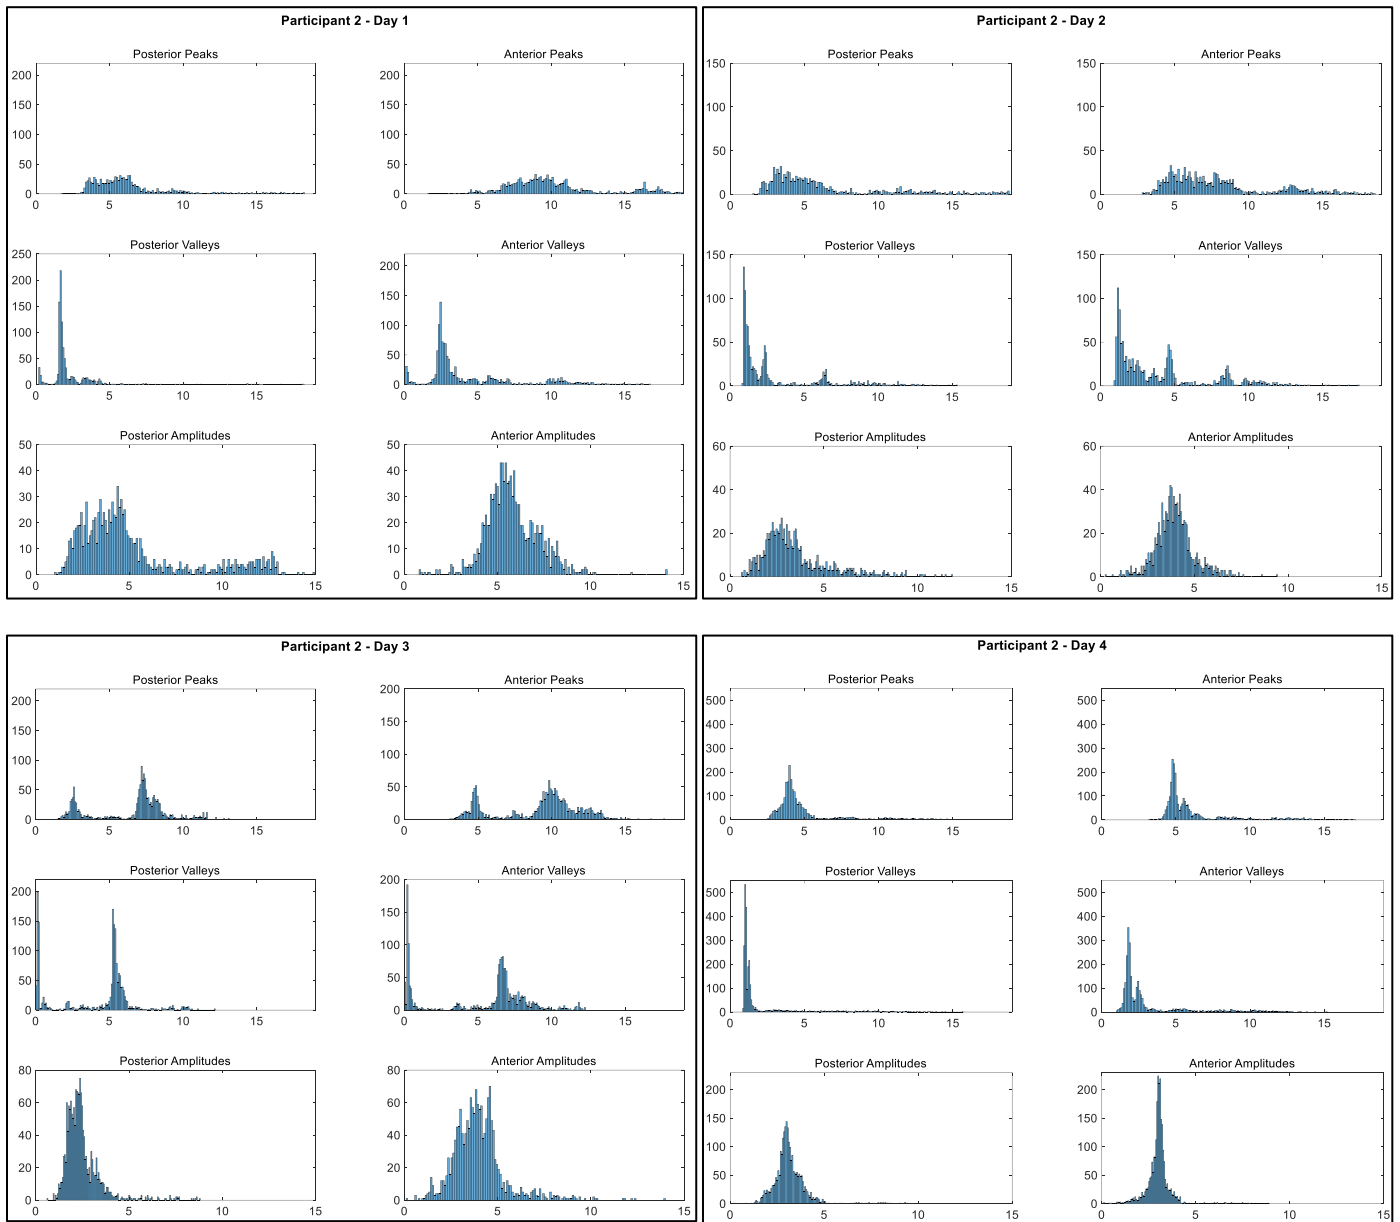

**Figure S4b.** Peak, valley, and amplitude histograms. Participant 2. Y-axes are number of steps. X-axes are distance in mm.

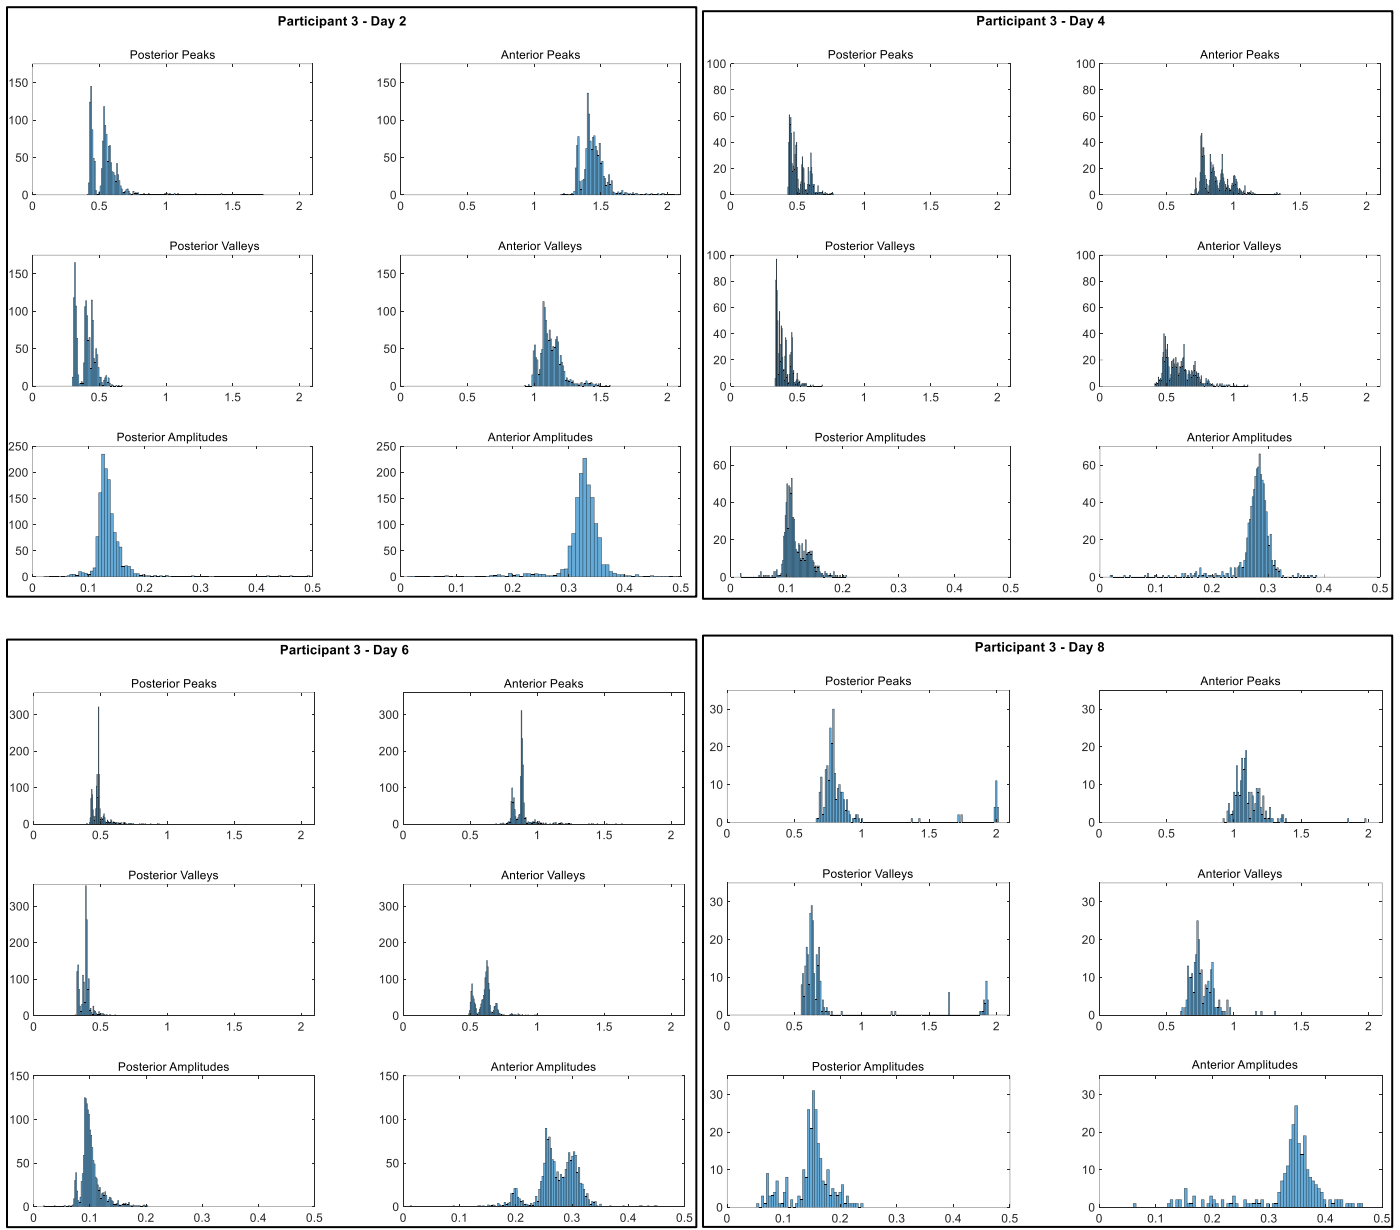

**Figure S4c.** Peak, valley, and amplitude histograms. Participant 3. Y-axes are number of steps. X-axes are distance in mm.

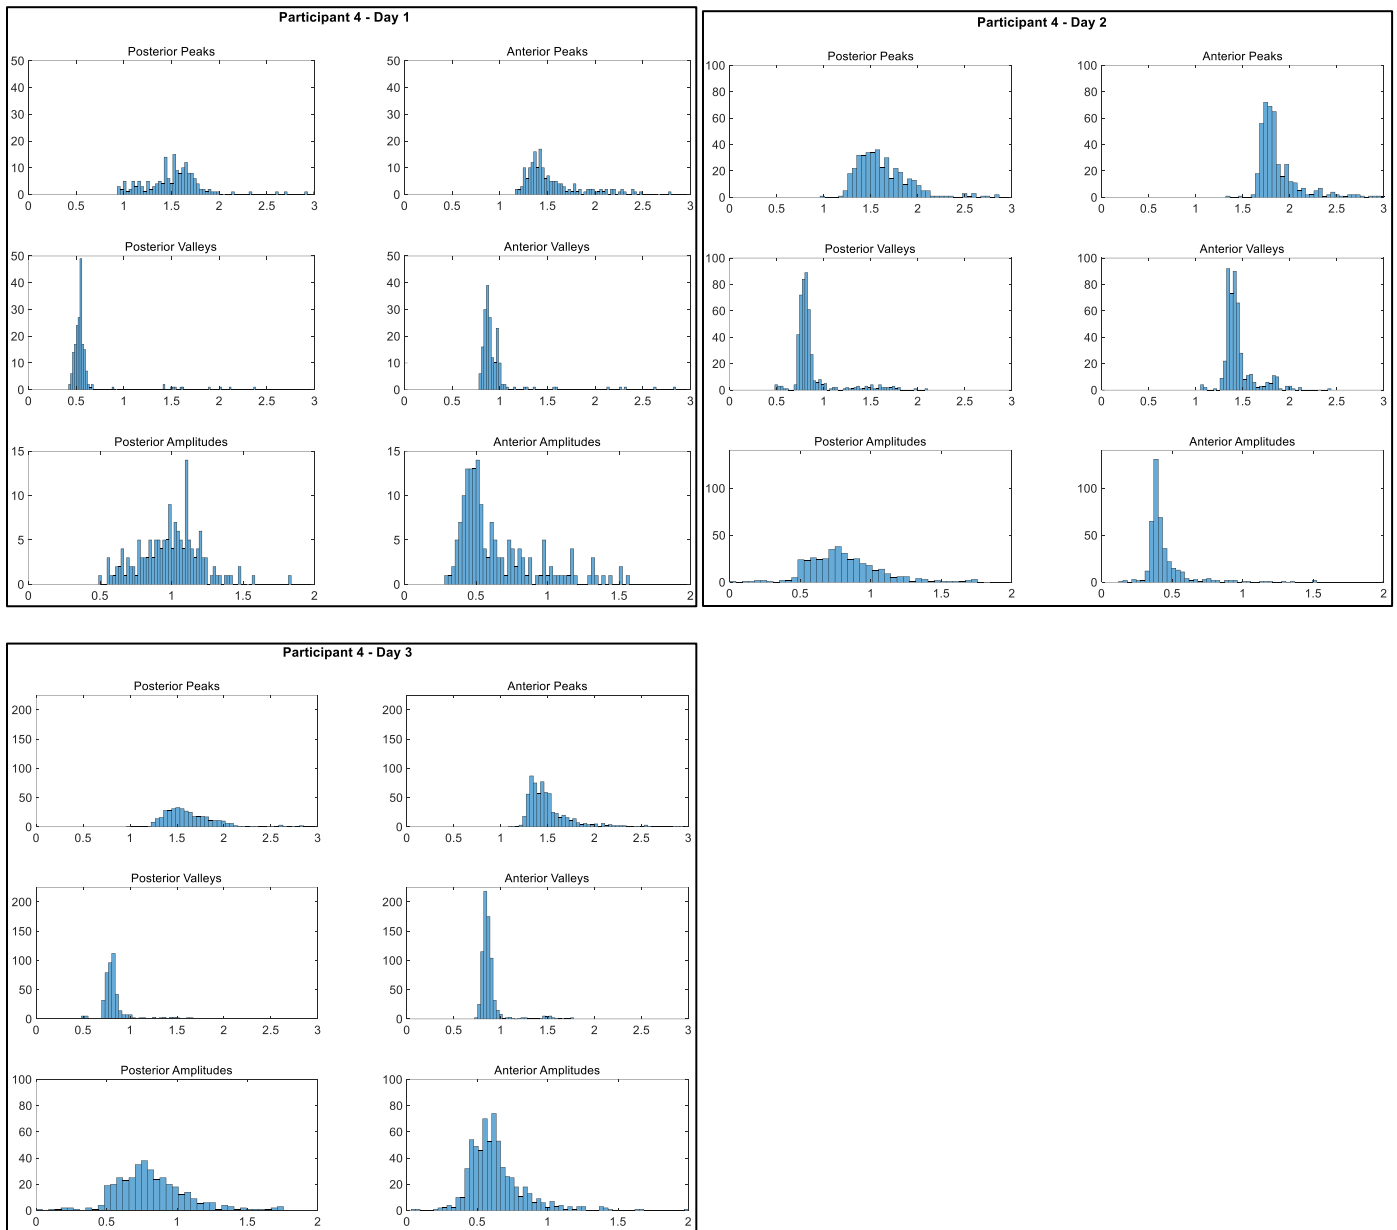

**Figure S4d.** Peak, valley, and amplitude histograms. Participant 4. Y-axes are number of steps. X-axes are distance in mm.
