# Supplementary material for: An Instrumented Printed Insert for Continuous Monitoring of Distal Limb Motion in Suction and Elevated Vacuum Sockets
Source: MDPI journal article supplement (doi:10.3390/prosthesis4040056), 2022-12-02
Supplement: s1 [file s1]

### Supplement Figure S1

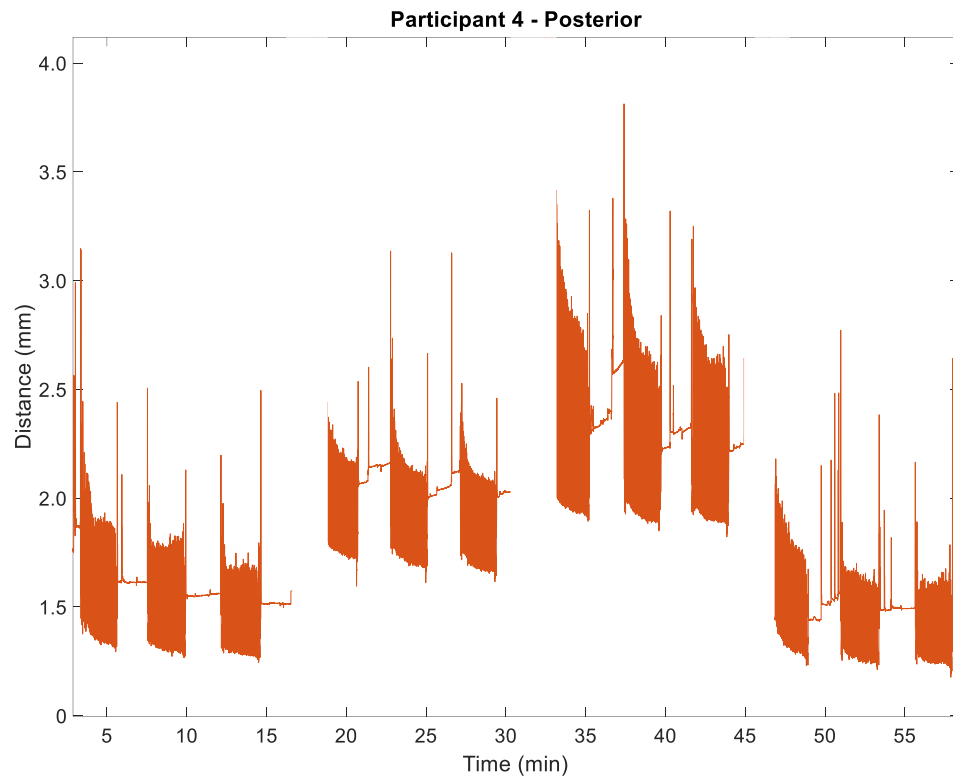

**Figure S1.** Sensed distance data during the in-lab protocol. Example data from participant 4 showing relatively little step-to-step variation in stance phase minima.
