# Supplementary material for: An Instrumented Printed Insert for Continuous Monitoring of Distal Limb Motion in Suction and Elevated Vacuum Sockets
Source: MDPI journal article supplement (doi:10.3390/prosthesis4040056), 2022-12-02
Supplement: s1 [file s1]

## Supplement Table S2

Table S2. Step count for each prosthesis day.

| Participant | Day Number | Step Count |
|-------------|------------|------------|
| 1           | 2          | 5,480      |
|             | 4          | 1,026      |
|             | 5          | 1,607      |
|             | 6          | 5,737      |
| 2           | 1          | 5,061      |
|             | 2          | 7,119      |
|             | 3          | 9,719      |
|             | 4          | 5,908      |
| 3           | 2          | 1,868      |
|             | 3          | 78         |
|             | 4          | 886        |
|             | 6          | 2,011      |
|             | 8          | 486        |
| 4           | 1          | 765        |
|             | 2          | 439        |
|             | 3          | 455        |
