# Supplementary material for: An Instrumented Printed Insert for Continuous Monitoring of Distal Limb Motion in Suction and Elevated Vacuum Sockets
Source: MDPI journal article supplement (doi:10.3390/prosthesis4040056), 2022-12-02
Supplement: s1 [file s1]

Supplement Figure S3

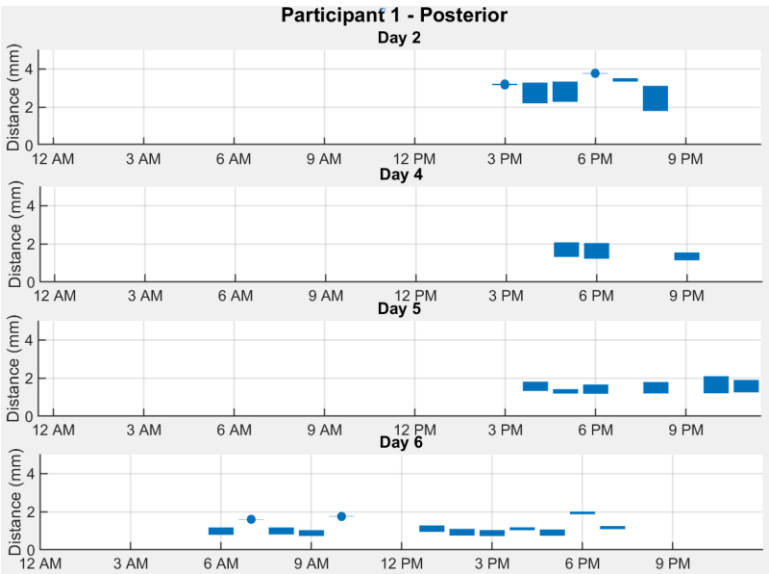

(a)

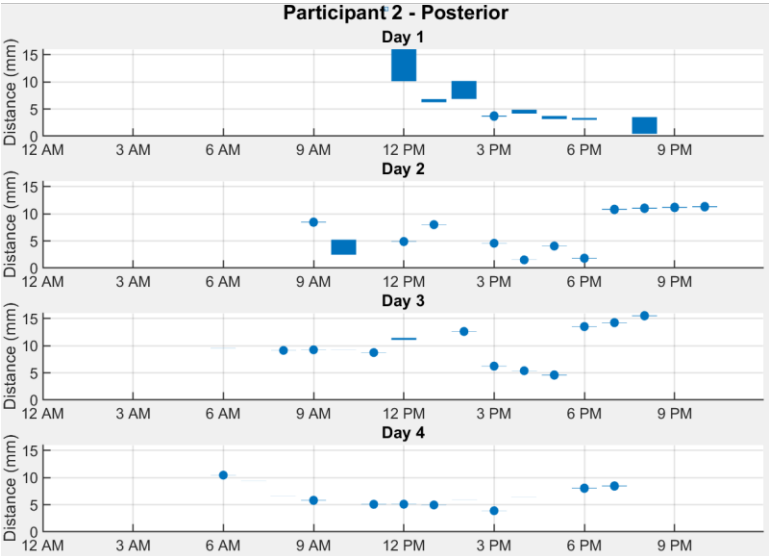

(b)

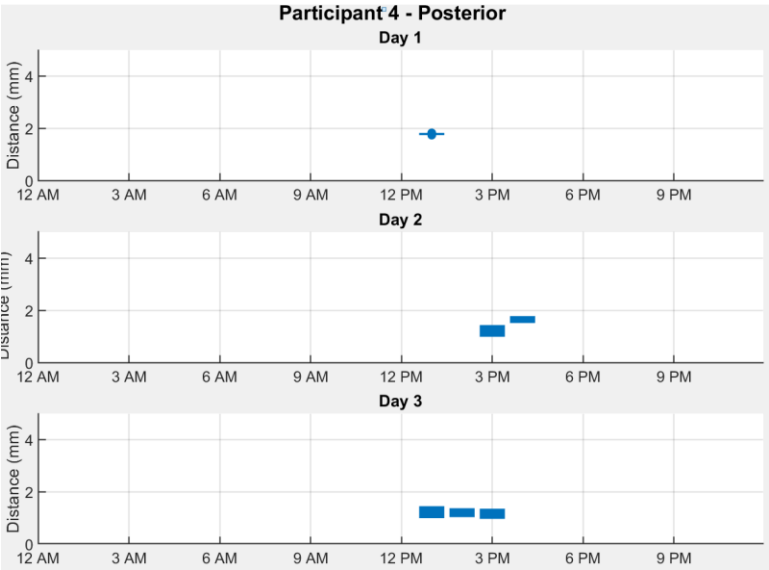

(c)

**Figure S3a-c.** Limb position data by hour for participants 1, 2 and 4. The top of a blue bar is the median of the peaks during all steps during the hour, and the bottom is the median of the valleys. A blue dot is added to blue bars that are short and difficult to see. A consistent trend over time was not observed for these participants, like that observed participant 3 (Fig. 6).
